# Supplementary material
Source: HighWire-hosted journal article supplement (https://www.cmajopen.ca/highwire/filestream/87103/field_highwire_adjunct_files/1/2020-0303-2-at.pdf)
Supplement: 2020-0303-2-at.pdf [file 2020-0303-2-at.pdf]

## Appendix 2. Extracted metadata fields from PMC, PubMed, and the PMC Open Access Subset

| Metadata Field               | Description                                                                                                                                                  | PMC metadata | PMC Open Access Subset | MEDLINE / PubMed Dataset metadata |
|------------------------------|--------------------------------------------------------------------------------------------------------------------------------------------------------------|--------------|------------------------|-----------------------------------|
| Author affiliation           | Includes the institutional affiliation and address (including email address, when available) of the authors of the publication as it appears in the journal. | x            | x                      | x                                 |
| Publication date             | The date that the publication was published.                                                                                                                 | x            | x                      | x                                 |
| Journal title                | The journal title abbreviation, full journal title, or ISSN number                                                                                           | x            | x                      | x                                 |
| Publication type             | The type of publication as categorized by MEDLINE                                                                                                            | x            | x                      | x                                 |
| Corresponding author         | The name of the corresponding author of the publication                                                                                                      | x            | x                      | x                                 |
| Data availability statements | publications or manuscripts with data availability statements                                                                                                |              | x                      |                                   |
| Data citations               | publications or manuscripts with data citations                                                                                                              |              | x                      |                                   |
| MeSH Major Topic Headings    | A MeSH term that is one of the main topics discussed in the publication.                                                                                     | x            | x                      | x                                 |
| publication body - Key Terms | Includes all key terms in the body of a publication except for the Abstract and References.                                                                  |              | x                      |                                   |
| Acknowledgements             | Includes all words in the acknowledgement section of a publication (e.g., "National Institutes of Health[ack]").                                             | x            | x                      |                                   |

|              |                                                                                                                                                                                                                                 |   |   |   |
|--------------|---------------------------------------------------------------------------------------------------------------------------------------------------------------------------------------------------------------------------------|---|---|---|
| Grant number | The grant number search field includes research grant numbers, contract numbers, or both that designate financial support by Agency of the US PHS (Public Health Service), and other national or international funding sources. | x | x | x |
|--------------|---------------------------------------------------------------------------------------------------------------------------------------------------------------------------------------------------------------------------------|---|---|---|
